# Supplementary material
Source: Research Square preprint supplement (doi:10.21203/rs.3.rs-10109139/v1)
Supplement: Supplementary file 1 [file 9b6efa41ec97791a4e8b76f4.xlsx]

## Sheet: S1.ancestralProfile
Supplementary Table 1. Statistics of the ancestral profiling results
		Gene number					Percentage
Class	chr	Cma	Cme	Cre	UN	Total	Cma_pct	Cre_pct	Cme_pct	UN_pct
Cma/Cre-derived genes	Chr01B	479	40	1133	936	2588	18.51	43.78	1.55	36.17
	Chr02A	987	54	1316	1084	3441	28.68	38.24	1.57	31.5
	Chr03A	918	68	889	1464	3339	27.49	26.62	2.04	43.85
	Chr04A	296	35	1567	994	2892	10.24	54.18	1.21	34.37
	Chr05A	1367	64	1620	1735	4786	28.56	33.85	1.34	36.25
	Chr06A	670	36	985	782	2473	27.09	39.83	1.46	31.62
	Chr07A	1315	63	592	825	2795	47.05	21.18	2.25	29.52
	Chr08A	366	43	1248	1187	2844	12.87	43.88	1.51	41.74
	Chr09A	151	22	1341	1226	2740	5.51	48.94	0.8	44.74
Cme-derived gene	Chr01A	244	1254	155	1077	2730	8.94	5.68	45.93	39.45
	Chr02B	317	1787	219	1223	3546	8.94	6.18	50.39	34.49
	Chr03B	263	1407	161	1421	3252	8.09	4.95	43.27	43.7
	Chr04B	246	1466	176	1215	3103	7.93	5.67	47.24	39.16
	Chr05B	382	2416	222	1574	4594	8.32	4.83	52.59	34.26
	Chr06B	235	1331	120	924	2610	9	4.6	51	35.4
	Chr07B	246	1572	167	1121	3106	7.92	5.38	50.61	36.09
	Chr08B	209	1237	160	1344	2950	7.08	5.42	41.93	45.56
	Chr09B	178	1183	138	1379	2878	6.18	4.79	41.1	47.92

## Sheet: S2.biasKaKs
Supplementary Table 2. Three resource genes with biased expression and Ka/Ks > 1
gene	Cli_chr	hap_source	Ka	Ks	Ka_Ks	KaKs_pvalue	KaKs_qvalue	Description	GOs	KEGG_ko	Mean_Log2FC(A/B)	Expression_bias_FDR
NM_gene05887	Chr01B	Cma	0.0212253	0.0074907	2.83356	0.909774	1	Mitochondrial transcription termi-tion factor family protein	-	ko:K15032	1.16429	0.00169643
NM_gene06829	Chr02A	Cma	0.0341224	0.0189106	1.80441	0.906832	1	-	-	-	0.581538	0.00730301
NM_gene07313	Chr02A	Cma	0.0164616	0.0115387	1.42664	0.833333	1	Belongs to the adenylate ki-se family	-	ko:K00939	0.975044	0.00123054
NM_gene07852	Chr02A	Cma	0.00952847	0.00631915	1.50787	0.818182	1	-	-	-	1.48421	0.0113808
NM_gene16657	Chr03A	Cma	2.1984	1.45271	1.51334	0.672409	0.946882	-	-	-	0.90786	0.0116631
NM_gene24860	Chr04A	Cma	0.0172298	0.0136058	1.26635	0.833333	1	-	-	-	3.10865	0.0232822
NM_gene30092	Chr05A	Cma	0.0130651	0.0115609	1.13096	0.833333	1	TAF R- Polymerase I subunit A	-	-	0.336508	0.00348796
NM_gene41464	Chr06A	Cma	2.42361	1.87035	1.29581	0.640011	0.940947	-	-	-	0.964297	0.00250587
NM_gene45857	Chr07A	Cma	0.00633166	0.00552743	1.1455	0.833333	1	F-box FBD LRR-repeat protein	-	-	1.17355	0.00225678
NM_gene47891	Chr07A	Cma	0.0133337	0.0107916	1.23557	0.833333	1	cytosolic	GO:0000270,GO:0000323,GO:0003674,GO:0003824,GO:0004553,GO:0004563,GO:0005575,GO:0005576,GO:0005615,GO:0005622,GO:0005623,GO:0005737,GO:0005764,GO:0005773,GO:0005975,GO:0006022,GO:0006026,GO:0006027,GO:0006464,GO:0006491,GO:0006517,GO:0006807,GO:0008150,GO:0008152,GO:0009056,GO:0009057,GO:0009100,GO:0009253,GO:0009605,GO:0009607,GO:0009617,GO:0009987,GO:0015929,GO:0016052,GO:0016231,GO:0016787,GO:…	ko:K01227	0.76044	0.0023172
NM_gene47947	Chr07A	Cma	0.014096	0.0137935	1.02193	0.857143	1	CTD small phosphatase-like protein	GO:0003674,GO:0003824,GO:0004721,GO:0006464,GO:0006470,GO:0006793,GO:0006796,GO:0006807,GO:0008150,GO:0008152,GO:0009987,GO:0016311,GO:0016787,GO:0016788,GO:0016791,GO:0019538,GO:0036211,GO:0042578,GO:0043170,GO:0043412,GO:0044237,GO:0044238,GO:0044260,GO:0044267,GO:0071704,GO:0140096,GO:1901564	ko:K15731	0.382181	0.041984
NM_gene60144	Chr09A	Cma	1.30752	0.946453	1.3815	0.685449	0.963342	D--directed R-	GO:0000418,GO:0000419,GO:0000428,GO:0005575,GO:0005622,GO:0005623,GO:0005634,GO:0005654,GO:0005665,GO:0005666,GO:0005730,GO:0005736,GO:0016591,GO:0030880,GO:0031974,GO:0031981,GO:0032991,GO:0043226,GO:0043227,GO:0043228,GO:0043229,GO:0043231,GO:0043232,GO:0043233,GO:0044422,GO:0044424,GO:0044428,GO:0044446,GO:0044451,GO:0044452,GO:0044464,GO:0055029,GO:0061695,GO:0070013,GO:1902494,GO:1990234	ko:K03013	0.810157	0.00151909
NM_gene05887	Chr01B	Cma	0.00842705	0.00746275	1.12922	0.833333	1	Mitochondrial transcription termi-tion factor family protein	-	ko:K15032	1.16429	0.00169643
NM_gene06351	Chr02A	Cma	0.00876745	0.00845377	1.03755	0.758824	1	Belongs to the UDP-glycosyltransferase family	GO:0003674,GO:0003824,GO:0005575,GO:0005622,GO:0005623,GO:0008194,GO:0016740,GO:0016757,GO:0016758,GO:0035251,GO:0043226,GO:0043227,GO:0043229,GO:0043231,GO:0044424,GO:0044464,GO:0046527,GO:0080043,GO:0080044	-	1.02203	0.0480141
NM_gene16657	Chr03A	Cma	2.25687	1.3855	1.62892	0.672409	0.897105	-	-	-	0.90786	0.0116631
NM_gene30493	Chr05A	Cma	0.00475752	0.00180968	2.62892	0.913313	1	Pentatricopeptide repeat-containing protein	-	-	0.525778	0.0173478
NM_gene41464	Chr06A	Cma	1.71121	1.70299	1.00483	0.580415	0.853038	-	-	-	0.964297	0.00250587
NM_gene45732	Chr07A	Cma	0.0160113	0.0112572	1.42231	0.833333	1	50S ribosomal protein L18	-	-	1.66947	0.00322127
NM_gene45763	Chr07A	Cma	0.0310724	0.0256984	1.20912	0.833333	1	Purple acid phosphatase	-	ko:K22390	1.16306	0.00139599
NM_gene54558	Chr08A	Cma	0.00832186	0.00462251	1.80029	0.807692	1	-	-	-	0.68729	0.0330517
NM_gene60144	Chr09A	Cma	1.38196	0.946453	1.46015	0.68479	0.912105	D--directed R-	GO:0000418,GO:0000419,GO:0000428,GO:0005575,GO:0005622,GO:0005623,GO:0005634,GO:0005654,GO:0005665,GO:0005666,GO:0005730,GO:0005736,GO:0016591,GO:0030880,GO:0031974,GO:0031981,GO:0032991,GO:0043226,GO:0043227,GO:0043228,GO:0043229,GO:0043231,GO:0043232,GO:0043233,GO:0044422,GO:0044424,GO:0044428,GO:0044446,GO:0044451,GO:0044452,GO:0044464,GO:0055029,GO:0061695,GO:0070013,GO:1902494,GO:1990234	ko:K03013	0.810157	0.00151909
NM_gene01759	Chr01A	Cma	0.0275984	0.0234394	1.17744	0.758824	0.986241	-	-	-	-0.351819	0.00133308
NM_gene21130	Chr03B	Cme	0.0351364	0.0325034	1.08084	0.818182	1	Belongs to the sulfotransferase 1 family	-	-	-0.661209	0.00860261
NM_gene20752	Chr03B	Cme	0.00347842	0.00163845	2.123	1	1	-	-	-	-1.66532	0.00246369
NM_gene27952	Chr04B	Cme	2.70193	2.36455	1.14268	0.676382	0.889854	-	-	-	-0.970603	0.0189468
NM_gene36508	Chr05B	Cme	0.00989025	0.00980406	1.00879	0.758824	0.986241	-	-	-	-0.515557	0.0369438
NM_gene38352	Chr05B	Cme	1.21138	1.15419	1.04955	0.605186	0.848444	-	-	-	-0.851884	0.0229754
NM_gene44430	Chr06B	Cme	0.0246651	0.00855472	2.88322	0.959259	1	-	-	-	-1.92231	0.00815917
NM_gene43361	Chr06B	Cme	0.00215944	0.00179748	1.20137	0.833333	1	Receptor protein ki-se	GO:0005575,GO:0016020	-	-0.462485	0.0309704
NM_gene49669	Chr07B	Cme	0.0958638	0.0941588	1.01881	0.633657	0.877744	protein C4orf29 homolog	-	-	-0.487485	0.0065078
NM_gene51242	Chr07B	Cme	1.03008	1.00293	1.02707	0.599824	0.842548	-	-	-	-0.699142	0.0465633
NM_gene61839	Chr09B	Cme	0.00280538	0.00240481	1.16657	0.833333	1	BEST Arabidopsis thalia- protein match is Uncharacterised conserved protein UCP015417, vWA (TAIR	-	-	-1.06595	0.0344737
NM_gene03950	Chr01B	Cre	0.003476	0.00289087	1.2024	0.833333	1	ABC transporter C family member	-	ko:K05666,ko:K05670	3.3052	0.00668
NM_gene04057	Chr01B	Cre	0.00541588	0.00520158	1.0412	0.758824	1	-	-	-	0.398305	0.0250284
NM_gene05661	Chr01B	Cre	0.0142377	0.0127935	1.11289	0.758824	1	-	-	-	1.08238	0.00289151
NM_gene22399	Chr04A	Cre	0.0466087	0.0413423	1.12739	0.713527	0.999848	Nudix hydrolase 20	GO:0003674,GO:0003824,GO:0005575,GO:0005622,GO:0005623,GO:0005737,GO:0009507,GO:0009536,GO:0016462,GO:0016787,GO:0016817,GO:0016818,GO:0017110,GO:0043226,GO:0043227,GO:0043229,GO:0043231,GO:0044424,GO:0044444,GO:0044464,GO:0044715	-	0.326736	0.0288854
NM_gene39987	Chr06A	Cre	1.27658	1.26528	1.00893	0.572811	0.925798	-	-	-	0.247645	0.00594081
NM_gene52050	Chr08A	Cre	0.0161906	0.0101869	1.58935	0.818182	1	R- pseudouridine synthase 4	GO:0001522,GO:0003674,GO:0003824,GO:0005575,GO:0005622,GO:0005623,GO:0005737,GO:0005739,GO:0006139,GO:0006396,GO:0006399,GO:0006400,GO:0006725,GO:0006807,GO:0008033,GO:0008150,GO:0008152,GO:0009451,GO:0009982,GO:0009987,GO:0010467,GO:0016070,GO:0016853,GO:0016866,GO:0031119,GO:0034470,GO:0034641,GO:0034660,GO:0043170,GO:0043226,GO:0043227,GO:0043229,GO:0043231,GO:0043412,GO:0044237,GO:0044238,GO:…	-	0.761154	0.00306924
NM_gene04602	Chr01B	Cre	0.0132211	0.0121337	1.08961	0.857143	1	chaperone protein	-	ko:K03686	0.483408	0.00634754
NM_gene04950	Chr01B	Cre	0.0177418	0.0112152	1.58195	0.818182	1	Glutamyl-tR- reductase-binding protein	GO:0003674,GO:0005488,GO:0005515,GO:0005575,GO:0005622,GO:0005623,GO:0005737,GO:0006091,GO:0006725,GO:0006807,GO:0007275,GO:0008150,GO:0008152,GO:0009058,GO:0009507,GO:0009532,GO:0009534,GO:0009536,GO:0009570,GO:0009579,GO:0009767,GO:0009791,GO:0009889,GO:0009891,GO:0009893,GO:0009987,GO:0015979,GO:0018130,GO:0019222,GO:0019438,GO:0019684,GO:0022900,GO:0031323,GO:0031325,GO:0031326,GO:0031328,GO:…	-	0.575216	0.0176416
NM_gene08678	Chr02A	Cre	0.045711	0.0147425	3.06312	0.909774	1	Belongs to the multi antimicrobial extrusion (MATE) (TC 2.A.66.1) family	GO:0003674,GO:0005215,GO:0005575,GO:0005622,GO:0005623,GO:0005737,GO:0005773,GO:0005774,GO:0006810,GO:0006855,GO:0008150,GO:0015238,GO:0015893,GO:0016020,GO:0022857,GO:0031090,GO:0042221,GO:0042493,GO:0043226,GO:0043227,GO:0043229,GO:0043231,GO:0044422,GO:0044424,GO:0044437,GO:0044444,GO:0044446,GO:0044464,GO:0046618,GO:0050896,GO:0051179,GO:0051234,GO:0055085,GO:0098588,GO:0098805	ko:K03327	0.318621	0.0290954
NM_gene09711	Chr02A	Cre	0.00425609	0.00249636	1.70492	0.807692	1	-	-	-	0.316257	0.0114368
NM_gene22182	Chr04A	Cre	0.0235445	0.0127663	1.84428	0.8	1	-	-	-	1.48706	0.0180115
NM_gene22399	Chr04A	Cre	0.0422945	0.0412003	1.02656	0.718634	0.954407	Nudix hydrolase 20	GO:0003674,GO:0003824,GO:0005575,GO:0005622,GO:0005623,GO:0005737,GO:0009507,GO:0009536,GO:0016462,GO:0016787,GO:0016817,GO:0016818,GO:0017110,GO:0043226,GO:0043227,GO:0043229,GO:0043231,GO:0044424,GO:0044444,GO:0044464,GO:0044715	-	0.326736	0.0288854
NM_gene23068	Chr04A	Cre	0.0114634	0.0113477	1.01899	0.769231	1	-	-	-	0.707012	0.0111622
NM_gene24269	Chr04A	Cre	0.00729267	0.00605452	1.2045	0.833333	1	transcription factor	-	-	0.548734	0.0412074
NM_gene33131	Chr05A	Cre	0.0236008	0.0203402	1.1603	0.833333	1	-	-	-	1.04548	0.0365195
NM_gene33341	Chr05A	Cre	0.0381277	0.0239064	1.59487	0.818182	1	-	-	-	0.624727	0.00238133
NM_gene33367	Chr05A	Cre	0.0204268	0.0147425	1.38557	0.833333	1	Chiti-se domain-containing protein	-	ko:K17525	0.288648	0.0307214
NM_gene45042	Chr07A	Cre	0.0138893	0.0133932	1.03704	0.833333	1	-	-	-	0.361979	0.0288854
NM_gene45405	Chr07A	Cre	0.0133004	0.0116394	1.14271	0.833333	1	IAA-amino acid hydrolase ILR1-like	-	ko:K14664	2.01843	0.0126184
NM_gene51752	Chr08A	Cre	0.0157797	0.0121707	1.29653	0.833333	1	-	-	-	0.15251	0.0434568
NM_gene52050	Chr08A	Cre	0.0141015	0.0109892	1.28322	0.833333	1	R- pseudouridine synthase 4	GO:0001522,GO:0003674,GO:0003824,GO:0005575,GO:0005622,GO:0005623,GO:0005737,GO:0005739,GO:0006139,GO:0006396,GO:0006399,GO:0006400,GO:0006725,GO:0006807,GO:0008033,GO:0008150,GO:0008152,GO:0009451,GO:0009982,GO:0009987,GO:0010467,GO:0016070,GO:0016853,GO:0016866,GO:0031119,GO:0034470,GO:0034641,GO:0034660,GO:0043170,GO:0043226,GO:0043227,GO:0043229,GO:0043231,GO:0043412,GO:0044237,GO:0044238,GO:…	-	0.761154	0.00306924
NM_gene52314	Chr08A	Cre	0.0280562	0.0148489	1.88944	0.92491	1	Extra-large guanine nucleotide-binding protein 1-like	GO:0000166,GO:0001664,GO:0001882,GO:0001883,GO:0003674,GO:0003824,GO:0003924,GO:0005102,GO:0005488,GO:0005515,GO:0005525,GO:0005575,GO:0005622,GO:0005623,GO:0005634,GO:0005834,GO:0005886,GO:0006950,GO:0006952,GO:0007154,GO:0007165,GO:0007186,GO:0007187,GO:0007188,GO:0008150,GO:0009605,GO:0009607,GO:0009617,GO:0009898,GO:0009987,GO:0016020,GO:0016462,GO:0016787,GO:0016817,GO:0016818,GO:0017076,GO:…	ko:K04630	0.863001	0.00152462
NM_gene53529	Chr08A	Cre	0.0760144	0.0578321	1.3144	0.734783	0.975451	BEST Arabidopsis thalia- protein match is P-loop containing nucleoside triphosphate hydrolases superfamily protein (TAIR	-	ko:K10706	0.668965	0.0167486
